# Supplementary material
Source: Springer Nature journal article supplement (https://www.springermedizin.de/resource/supplementary/12943_2012_1042_MOESM1_ESM.pdf/9552168)
Supplement: MOESM1 [file 9552168]

## MDA-MB-231 cells

---

vector control

rab31 high

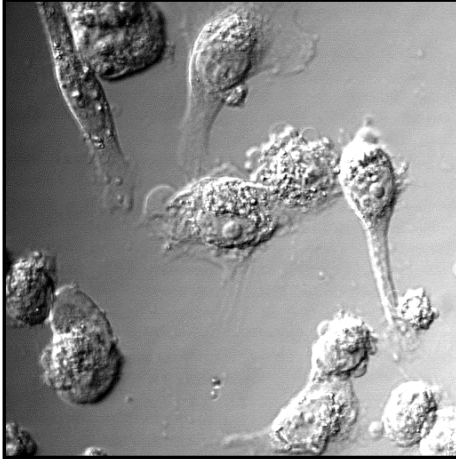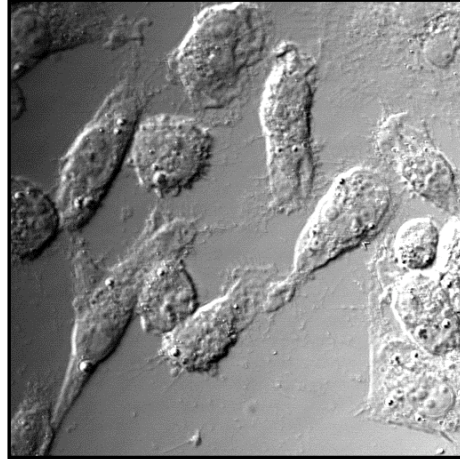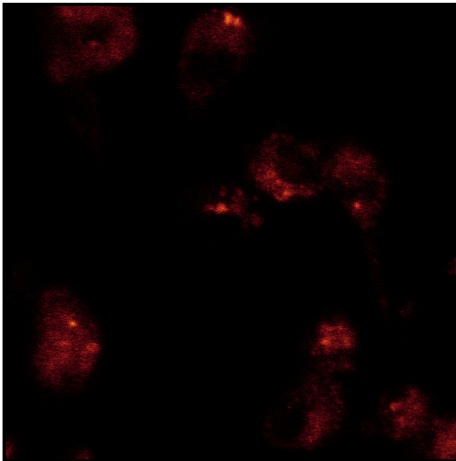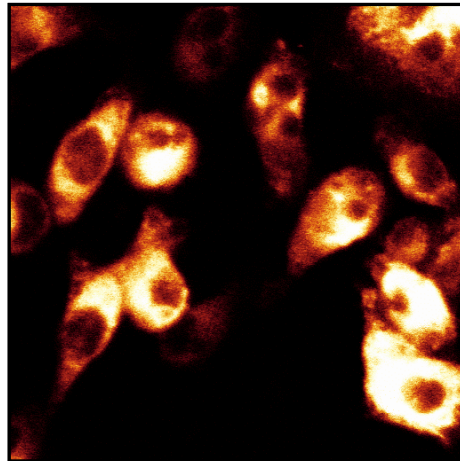

Suppl. Figure 1
